# Supplementary material for: Linking particle size to improved electrochemical performance of SiO anodes for Li-ion batteries
Source: Royal Society of Chemistry journal article supplement (doi:10.1039/c6ra25714c), 2017-01-01
Supplement: c6ra25714c1.pdf [file c6ra25714c1.pdf]

### Electronic Supplementary Information

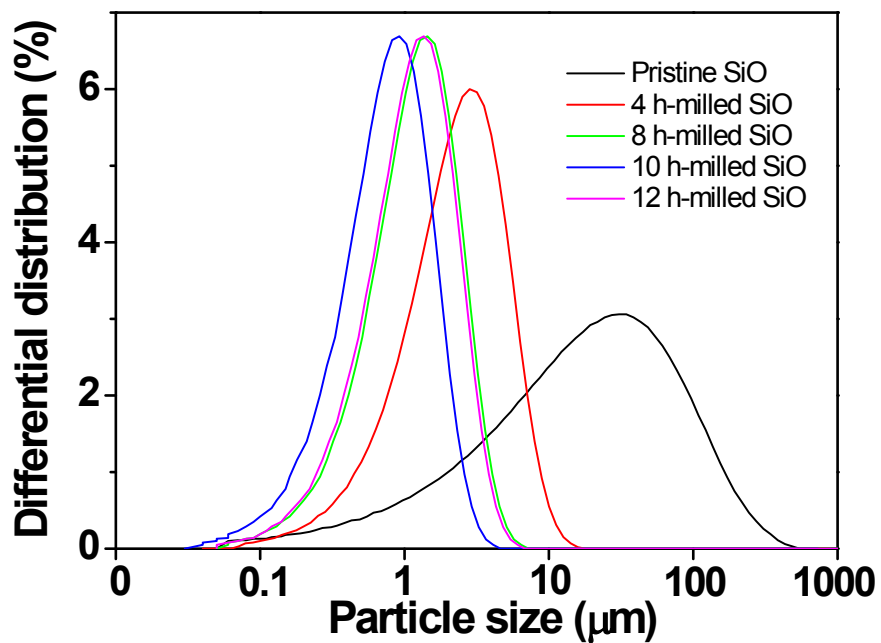

Figure S1 Particle size distribution curves of pristine and 4-12 h-milled SiO.

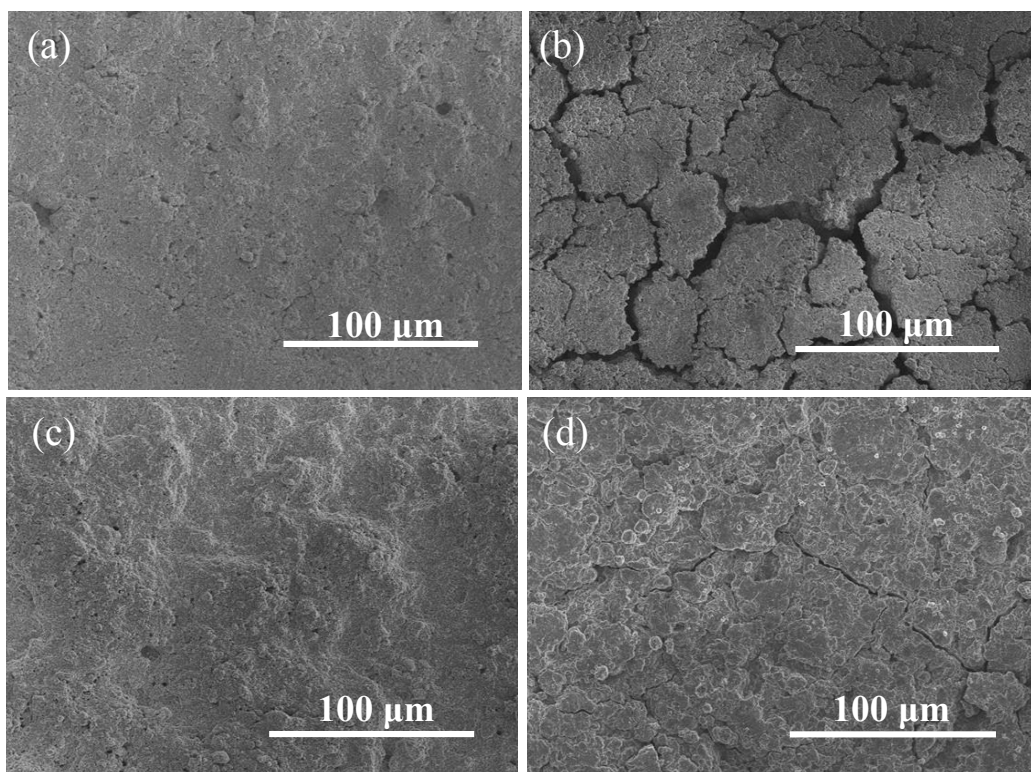

Figure S2 SEM images of 10 h-milled Si (a, b) and SiO electrodes (c, d). (a, c) as-prepared electrode, (b, d) after 150 cycles.

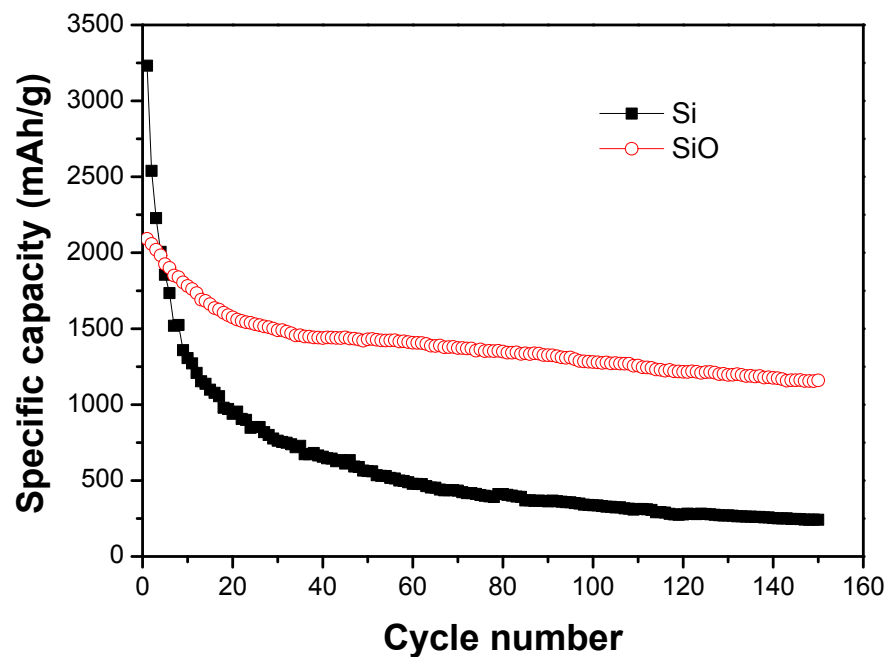

**Figure S3** Comparison of cycling performance of the as-milled Si and SiO.

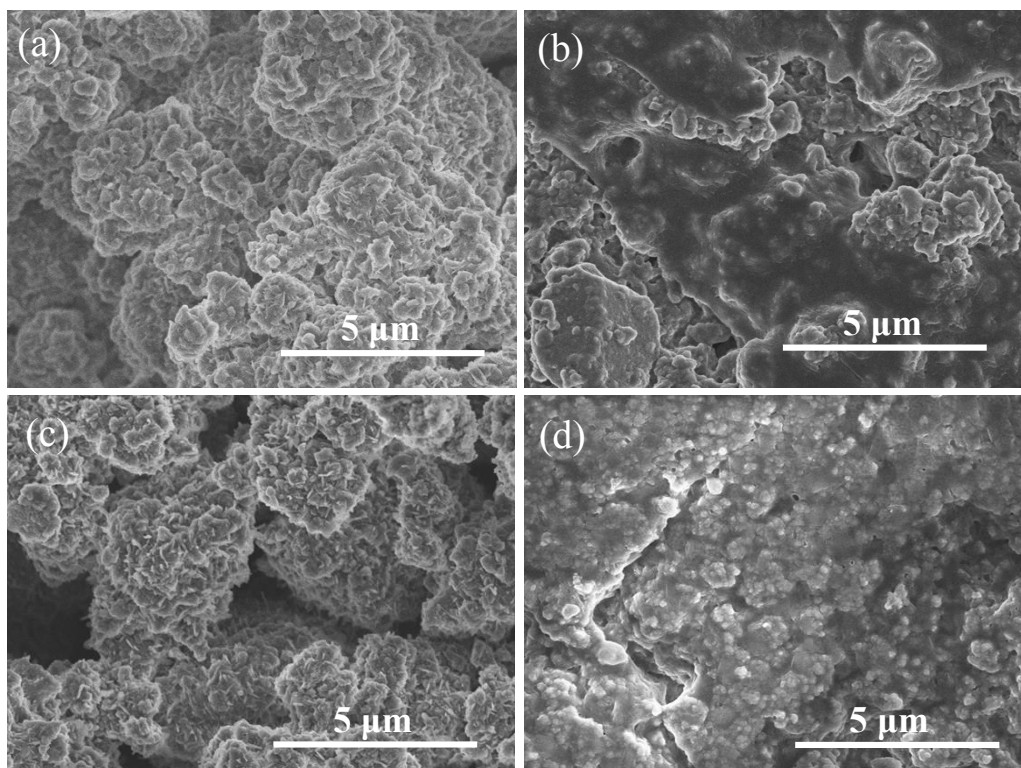

**Figure S4** SEM images of pristine (a, c) and 10 h-milled (b, d) SiO electrodes after 5 (a, b) and 150 (c, d) cycles.

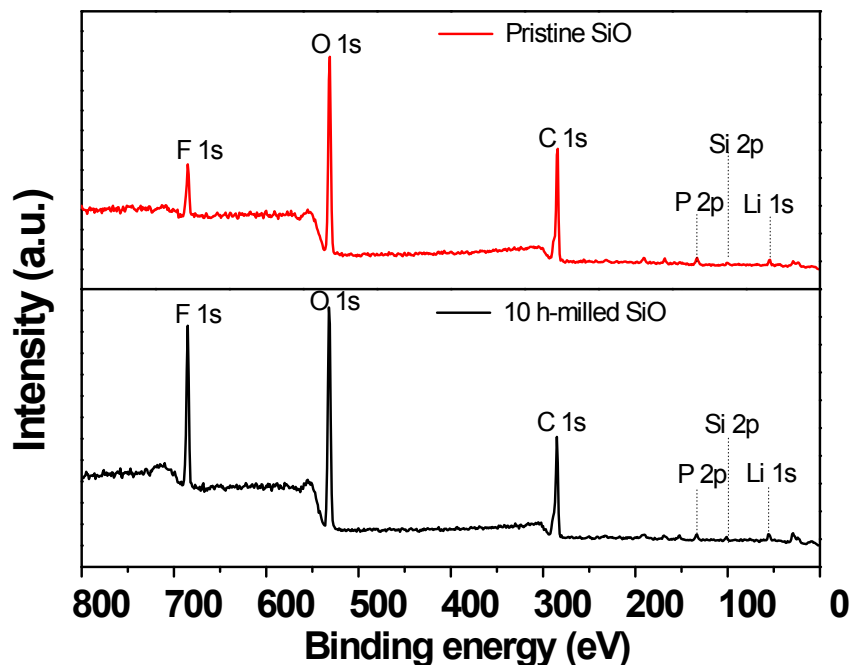

Figure S5 XPS survey spectra of pristine and 10 h-milled SiO electrodes after 150 cycles.

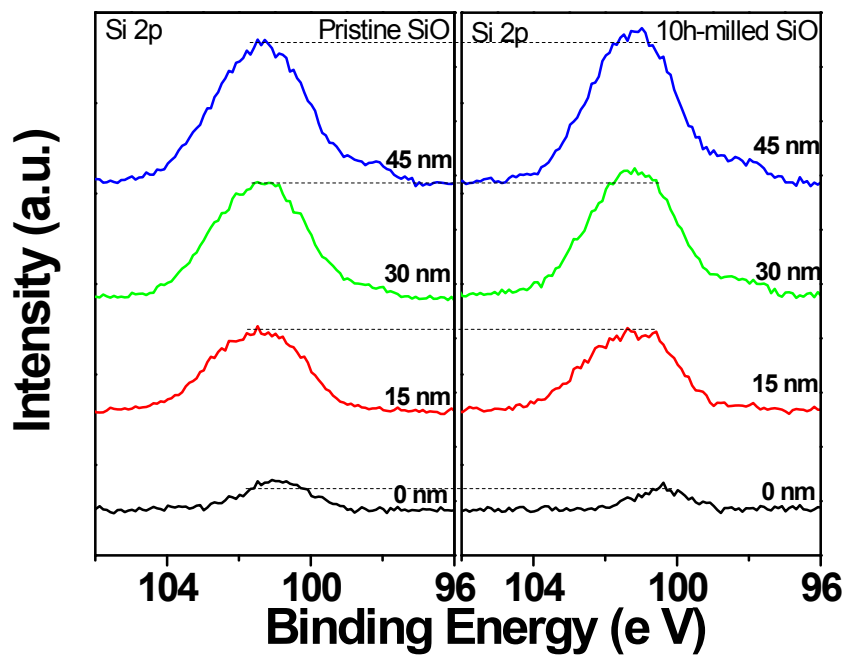

Figure S6 XPS spectra of Si 2p of the pristine and 10 h-milled SiO electrodes after 150 cycles as a function of depth.
